# Supplementary material
Source: Research Square preprint supplement (doi:10.21203/rs.3.rs-9172566/v1)
Supplement: Supplementary file 1 [file 213ccebf6ba616ebee01d057.pdf]

**Supplementary Information for Manuscript “Characterisation of a Portuguese origin founder missense variant in *MSH6*”.**

This PDF contains all supplementary information to accompany the manuscript as mentioned above. This includes images of IHC staining for the MMR proteins from two probands, a table detailing each family’s cancer history, and a table detailing the interpretation of our variant.

Table S1. Clinicopathological features of *MSH6* c.2061T>G carrier families

| Family | Country     | Clinical Criteria Fulfilled | N | Relationship to Proband | Sex | <i>MSH6</i> Status | Diagnosis                                 | Age  | IHC                                               |             |        |                     |  |
|--------|-------------|-----------------------------|---|-------------------------|-----|--------------------|-------------------------------------------|------|---------------------------------------------------|-------------|--------|---------------------|--|
|        |             |                             |   |                         |     |                    |                                           |      | MLH1                                              | MSH2        | MSH6   | PMS2                |  |
| I      | Canada      | Bethesda                    | 1 | Proband                 | F   | +/-                | HL                                        | 30s* |                                                   |             |        |                     |  |
|        |             |                             |   |                         |     |                    | EC                                        | 40s* | retained                                          | retained    | absent | retained            |  |
|        |             |                             |   |                         |     |                    | BIC                                       | 50s* |                                                   |             |        |                     |  |
|        |             |                             |   |                         |     |                    | RC                                        | 50s* | equivocal                                         | weak        | weak   | absent <sup>a</sup> |  |
|        |             |                             |   |                         |     |                    | CRC                                       | 50s* |                                                   | retained    |        |                     |  |
|        |             |                             |   |                         |     |                    | LC                                        | 60s  |                                                   |             |        |                     |  |
|        |             |                             |   |                         |     |                    |                                           |      |                                                   |             |        |                     |  |
|        |             |                             |   |                         |     |                    |                                           |      |                                                   |             |        |                     |  |
|        |             |                             |   |                         |     |                    |                                           |      |                                                   |             |        |                     |  |
|        |             |                             |   |                         |     |                    |                                           |      |                                                   |             |        |                     |  |
| II     | Canada      | Bethesda                    | 1 | Proband                 | F   | +/-                | EC <sup>d</sup>                           | 50s* | retained                                          | retained    | absent | retained            |  |
|        |             |                             |   |                         |     |                    | Daughter                                  | F    | +/*                                               |             |        |                     |  |
|        |             |                             |   |                         |     |                    | Brother                                   | M    | UNK                                               |             |        |                     |  |
|        |             |                             |   |                         |     |                    | Brother                                   | M    | UNK                                               |             |        |                     |  |
|        |             |                             |   |                         |     |                    | Brother                                   | M    | UNK                                               |             |        |                     |  |
|        |             |                             |   |                         |     |                    | 1 <sup>st</sup> Cousin (Mat)              | F    | UNK                                               |             |        |                     |  |
|        |             |                             |   |                         |     |                    | 1 <sup>st</sup> Cousin (Mat)              | M    | UNK                                               |             |        |                     |  |
|        |             |                             |   |                         |     |                    | 1 <sup>st</sup> Cousin (Mat)              | F    | UNK                                               |             |        |                     |  |
|        |             |                             |   |                         |     |                    | Uncle (Mat)                               | M    | UNK                                               |             |        |                     |  |
|        |             |                             |   |                         |     |                    | Aunt (Mat)                                | F    | UNK                                               |             |        |                     |  |
| III    | Portugal    | Amsterdam II                | 1 | Proband                 | F   | +/-                | EC <sup>e</sup>                           | 40s* | retained                                          | retained    | absent | retained            |  |
|        |             |                             |   |                         |     |                    | Mother                                    | F    | +/*                                               |             |        |                     |  |
|        |             |                             |   |                         |     |                    | Uncle (Mat)                               | M    | +/*                                               |             |        |                     |  |
|        |             |                             |   |                         |     |                    | Aunt (Mat)                                | F    | +/*                                               |             |        |                     |  |
| IV     | Portugal    | Bethesda                    | 1 | Proband                 | F   | +/-                | CRC <sup>g</sup>                          | 80s  |                                                   |             |        |                     |  |
|        |             |                             |   |                         |     |                    | Mother                                    | F    | UNK                                               |             |        |                     |  |
|        |             |                             |   |                         |     |                    | Sister                                    | F    | UNK                                               |             |        |                     |  |
|        |             |                             |   |                         |     |                    | 1 <sup>st</sup> Cousin (Mat)              | F    | UNK                                               |             |        |                     |  |
| V      | Portugal    | None                        | 1 | Proband                 | F   | +/-                | SSL w/D x 1                               | 40s* |                                                   | retained    |        |                     |  |
|        |             |                             |   |                         |     |                    | SSL x 1                                   | 40s* |                                                   |             |        |                     |  |
|        |             |                             |   |                         |     |                    | TA(LGD) x 9                               | 40s* |                                                   |             |        |                     |  |
|        |             |                             |   |                         |     |                    | TvA(LGD) x 1                              | 40s* |                                                   |             |        |                     |  |
|        |             |                             |   |                         |     |                    | TA(HGD) x 1                               | 60s* |                                                   |             |        |                     |  |
| VI     | Portugal    | Amsterdam II                | 1 | Proband                 | F   | +/-                | CRC                                       | 40s* | retained                                          | retained    | N/A    | retained            |  |
|        |             |                             |   |                         |     |                    | Father                                    | M    | UNK                                               |             |        |                     |  |
|        |             |                             |   |                         |     |                    | Daughter                                  | F    | +/*                                               | TA(LGD) x 1 | 20s    |                     |  |
|        |             |                             |   |                         |     |                    | Son                                       | M    | +/*                                               | TA(LGD) x 1 | 30s    |                     |  |
|        |             |                             |   |                         |     |                    | Sister                                    | F    | +/*                                               |             |        |                     |  |
|        |             |                             |   |                         |     |                    | Brother                                   | M    | UNK                                               |             |        |                     |  |
|        |             |                             |   |                         |     |                    | Nephew                                    | M    | UNK                                               |             |        |                     |  |
|        |             |                             |   |                         |     |                    | Uncle (Mat)                               | M    | UNK                                               |             |        |                     |  |
|        |             |                             |   |                         |     |                    | 1 <sup>st</sup> Cousin (Mat)              | F    | UNK                                               |             |        |                     |  |
| VII    | Portugal    | Amsterdam                   | 1 | Proband                 | M   | +/-                | CRC                                       | 50s  |                                                   |             |        |                     |  |
|        |             |                             |   |                         |     |                    | Father                                    | M    | UNK                                               |             |        |                     |  |
|        |             |                             |   |                         |     |                    | Mother                                    | F    | UNK                                               |             |        |                     |  |
|        |             |                             |   |                         |     |                    | Sister                                    | F    | UNK                                               |             |        |                     |  |
|        |             |                             |   |                         |     |                    | Sister                                    | F    | UNK                                               |             |        |                     |  |
|        |             |                             |   |                         |     |                    | Uncle (Pat)                               | M    | UNK                                               |             |        |                     |  |
|        |             |                             |   |                         |     |                    | Aunt (Pat)                                | F    | UNK                                               |             |        |                     |  |
|        |             |                             |   |                         |     |                    | 1 <sup>st</sup> Cousin (Pat)              | M    | UNK                                               |             |        |                     |  |
|        |             |                             |   |                         |     |                    | 1 <sup>st</sup> Cousin (Pat)              | F    | UNK                                               |             |        |                     |  |
|        |             |                             |   |                         |     |                    | 1 <sup>st</sup> Cousin Once Removed (Pat) | M    | UNK                                               |             |        |                     |  |
|        |             |                             |   |                         |     |                    | Aunt (Mat)                                | F    | UNK                                               |             |        |                     |  |
|        |             |                             |   |                         |     |                    | Aunt (Mat)                                | F    | UNK                                               |             |        |                     |  |
|        |             |                             |   |                         |     |                    | Uncle (Mat)                               | M    | UNK                                               |             |        |                     |  |
|        |             |                             |   |                         |     |                    | 1 <sup>st</sup> Cousin (Mat)              | M    | UNK                                               |             |        |                     |  |
|        |             |                             |   |                         |     |                    | 1 <sup>st</sup> Cousin (Mat)              | F    | UNK                                               |             |        |                     |  |
| VIII   | Switzerland | None                        | 1 | Proband                 | M   | -/VUS              | MB                                        | <10* | Loss of MSH6 in non-neoplastic cells <sup>f</sup> |             |        |                     |  |
|        |             |                             |   |                         |     |                    | GIC                                       | 20s  |                                                   |             |        |                     |  |
|        |             |                             |   |                         |     |                    | MG                                        |      |                                                   |             |        |                     |  |
| IX     | USA         | None                        | 1 | Proband                 | UNK | +/-                | CRC                                       | 50s  |                                                   |             |        |                     |  |
|        |             |                             |   |                         |     |                    |                                           |      |                                                   |             |        |                     |  |
|        |             |                             |   |                         |     |                    |                                           |      |                                                   |             |        |                     |  |
| X      | USA         | Bethesda                    | 1 | Proband                 | F   | +/-                | CRC                                       | 30s  |                                                   |             |        |                     |  |
|        |             |                             |   |                         |     |                    | EC                                        | 40s  |                                                   |             |        |                     |  |
| XI     | USA         | Bethesda                    | 1 | Proband                 | M   | +/-                | CRC <sup>g</sup>                          | 60s  | retained                                          | retained    | absent | retained            |  |
|        |             |                             |   |                         |     |                    | Father                                    | M    | UNK                                               |             |        |                     |  |
| XII    | USA         | Amsterdam II                | 1 | Proband                 | F   | +/-                | DCIS <sup>h</sup>                         | 30s  |                                                   |             |        |                     |  |
|        |             |                             |   |                         |     |                    | Sister                                    | F    | +/*                                               |             |        |                     |  |
|        |             |                             |   |                         |     |                    | Father                                    | M    | +/*                                               |             |        |                     |  |
|        |             |                             |   |                         |     |                    | Mother                                    | F    | UNK                                               |             |        |                     |  |
|        |             |                             |   |                         |     |                    | Aunt (Mat)                                | F    | UNK                                               |             |        |                     |  |
|        |             |                             |   |                         |     |                    | Grandfather (Pat)                         | M    | UNK                                               |             |        |                     |  |
|        |             |                             |   |                         |     |                    | Grandmother (Mat)                         | F    | UNK                                               |             |        |                     |  |
|        |             |                             |   |                         |     |                    | Great aunt (Mat)                          | F    | UNK                                               |             |        |                     |  |
|        |             |                             |   |                         |     |                    | 2nd Cousin (Mat)                          | M    | UNK                                               |             |        |                     |  |
|        |             |                             |   |                         |     |                    | 2nd Cousin (Mat)                          | F    | +/*                                               |             |        |                     |  |
| XIII   | Portugal    | Amsterdam II                | 1 | Proband                 | M   | +/-                | CRC                                       | 30s* |                                                   | retained    |        |                     |  |
|        |             |                             |   |                         |     |                    | Mother                                    | F    | UNK                                               |             |        |                     |  |
|        |             |                             |   |                         |     |                    | Aunt (Pat)                                | F    | UNK                                               |             |        |                     |  |
|        |             |                             |   |                         |     |                    | Grandmother (Mat)                         | F    | UNK                                               |             |        |                     |  |
|        |             |                             |   |                         |     |                    | Great aunt (Mat)                          | F    | UNK                                               |             |        |                     |  |
|        |             |                             |   |                         |     |                    | 1 <sup>st</sup> Cousin Once Removed (Mat) | M    | UNK                                               |             |        |                     |  |
| XIV    | Portugal    | Bethesda                    | 1 | Proband                 | F   | +/-                | CRC                                       | 40s  |                                                   |             |        |                     |  |
|        |             |                             |   |                         |     |                    | Mother                                    | F    | UNK                                               |             |        |                     |  |
|        |             |                             |   |                         |     |                    | Aunt (Mat)                                | F    | UNK                                               |             |        |                     |  |

| Legend                                                                                     |
|--------------------------------------------------------------------------------------------|
| BCC - basal cell carcinoma                                                                 |
| BIC - bladder cancer                                                                       |
| BrC - breast cancer                                                                        |
| CRC - colorectal cancer                                                                    |
| DC - duodenal cancer                                                                       |
| DCIS - ductal carcinoma in situ                                                            |
| EC - endometrial cancer                                                                    |
| GBL - gastric Burkitt lymphoma                                                             |
| GC - gastric cancer                                                                        |
| GIC - gastrointestinal cancer (origin unspecified)                                         |
| GynC - gynecological cancer of unknown origin                                              |
| HGG - high-grade glioma                                                                    |
| HL - Hodgkin's lymphoma                                                                    |
| LC - lung cancer                                                                           |
| MB - medulloblastoma                                                                       |
| MG - meningioma                                                                            |
| NHL - non-Hodgkin's lymphoma                                                               |
| OvC - ovarian cancer                                                                       |
| RC - renal cancer                                                                          |
| SkC - skin cancer                                                                          |
| SSL w/D - sessile serrated lesion with dysplasia                                           |
| SSL - sessile serrated lesion                                                              |
| TA(LGD) - tubular adenoma with low grade dysplasia                                         |
| ThC - thyroid cancer                                                                       |
| TvA(LGD) - tubulovillous adenoma with low grade dysplasia                                  |
| UC - urothelial cancer                                                                     |
| UNK - unknown                                                                              |
| <sup>a</sup> expression also absent in internal control                                    |
| <sup>b</sup> total abdominal hysterectomy at 53, now 73                                    |
| <sup>c</sup> tumour also microsatellite stable                                             |
| <sup>d</sup> <i>MSH6</i> c.3261del. p.(Phe1088SerfsTer2) in tumour                         |
| <sup>e</sup> <i>MSH6</i> c.3261del. p.(Phe1088SerfsTer2) in tumour at 31% allele frequency |
| <sup>f</sup> clinical CMMRD carrier of <i>MSH6</i> VUS c.1196C>T (p.Pro399Leu)             |
| <sup>g</sup> two primary colorectal cancers                                                |
| <sup>h</sup> multifocal DCIS                                                               |
| * confirmed with medical records                                                           |

Table S2. Interpretation of *MSH6* c.2061T>G (p.Cys687Trp)

| <b>CanVIG-UK Guidelines</b>                |                 |                                                                                                                                                                                                               |               |
|--------------------------------------------|-----------------|---------------------------------------------------------------------------------------------------------------------------------------------------------------------------------------------------------------|---------------|
| <b>Rule Applied</b>                        | <b>Strength</b> | <b>Evidence</b>                                                                                                                                                                                               | <b>Points</b> |
| Population data (PM2)                      | Moderate        | Absent from gnomAD                                                                                                                                                                                            | 2             |
| Cosegregation (PP1)                        | Supporting      | <1/8 LR                                                                                                                                                                                                       | 1             |
| Phenotypic specificity/Case counting (PP4) | Strong          | ≥3 independent CRC/Endometrial MSI-H tumours in ≥2 families using a standard panel of 5-10 markers and/or loss of MMR protein expression consistent with the variant location (Families I, II, III, VIII, XI) | 4             |
| In silico predictions (PP3)                | Supporting      | Variant is predicted as pathogenic by REVEL (score = 0.825)                                                                                                                                                   | 1             |
| Enrichment/constraint (PM1)                | Supporting      | Variant located in established connector domain; changes at amino acid positions 686 and 688 are damaging                                                                                                     | 1             |
| <b>Total:</b>                              |                 |                                                                                                                                                                                                               | <b>9</b>      |
| <b>ACMG Guidelines</b>                     |                 |                                                                                                                                                                                                               |               |
| <b>Rule Applied</b>                        | <b>Strength</b> | <b>Evidence</b>                                                                                                                                                                                               | <b>Points</b> |
| Phenotypic specificity (PP4)               | Strong          | ≥3 independent CRC/Endometrial MSI-H tumours in ≥2 families using a standard panel of 5-10 markers and/or loss of MMR protein expression consistent with the variant location (Families I, II, III, VIII, XI) | 4             |
| Population data (PM2)                      | Supporting      | Absent from gnomAD                                                                                                                                                                                            | 1             |
| Alternate Molecular Basis (BP5)            | Supporting      | MMR protein expression not consistent with variant location (Families I, III, IV, V, VI, XII, XIII)                                                                                                           | -1            |
| <b>Total:</b>                              |                 |                                                                                                                                                                                                               | <b>4</b>      |

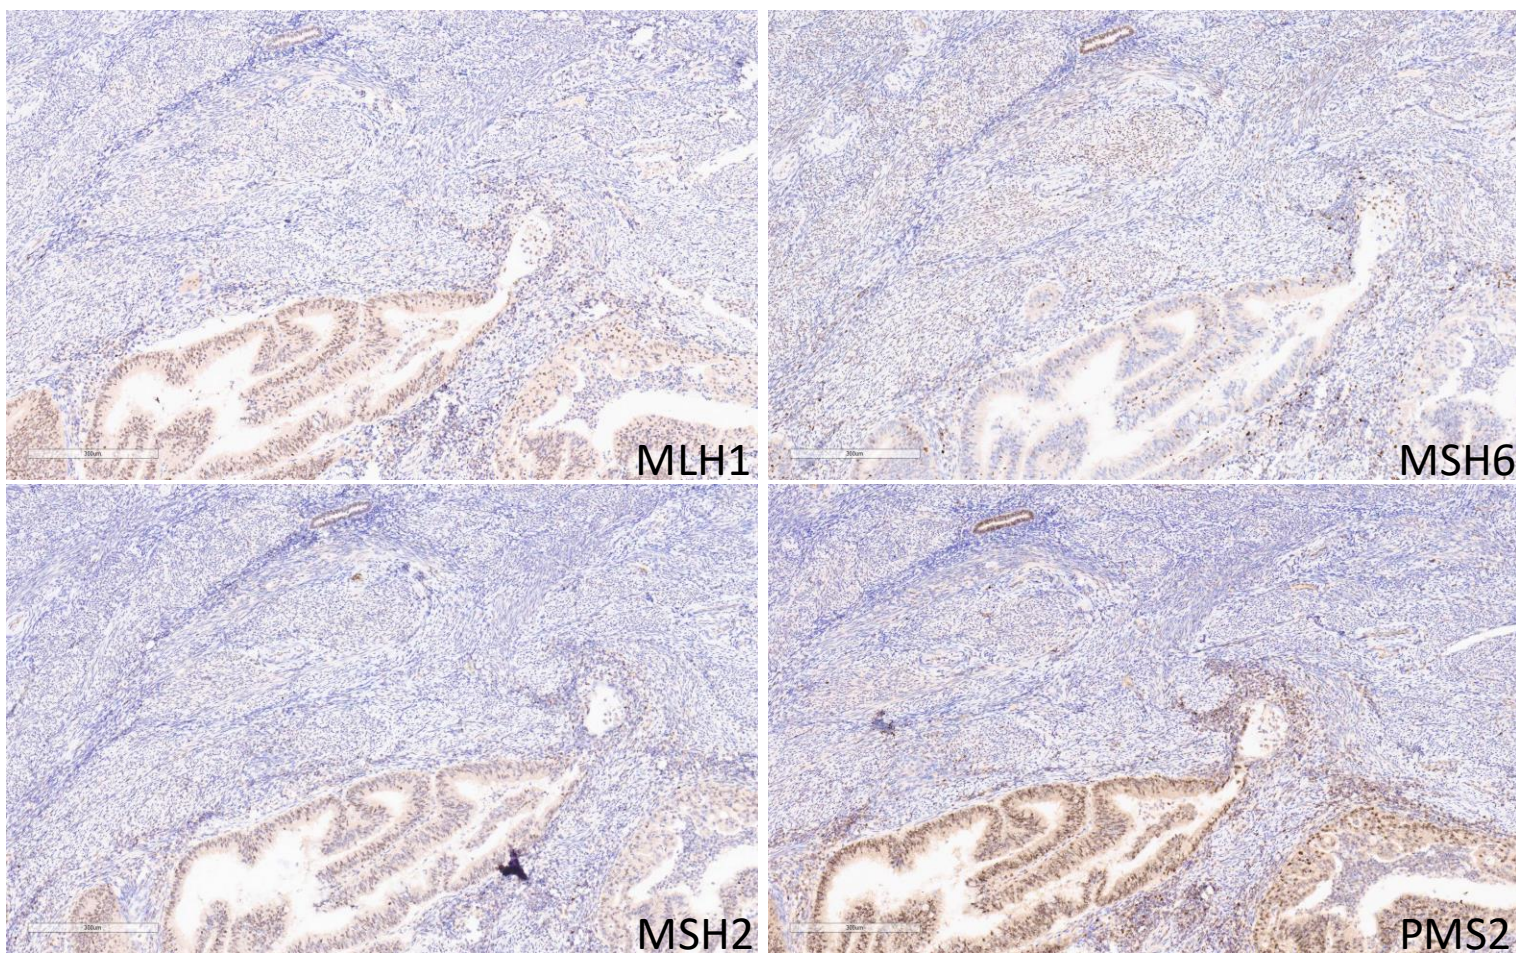

**Figure S1.** Immunohistochemistry of MMR proteins in endometrial cancer from proband of Family II

Female proband was diagnosed with MSH6-deficient endometrial cancer in her 50s. This individual is known to carry *MSH6* c.2061T>G in the germline. A second variant was identified in the tumor [*MSH6* c.3261del p.(Phe1088SerfsTer2)]. Magnification 100x. IHC performed using ready-to-use anti-bodies for Dako Omnis: anti-MLH1 (clone ES05) antibody, anti-MSH2 (clone FE11) antibody, anti-MSH6 (clone EP49) antibody, and anti-PMS2 (clone EP51) antibody.

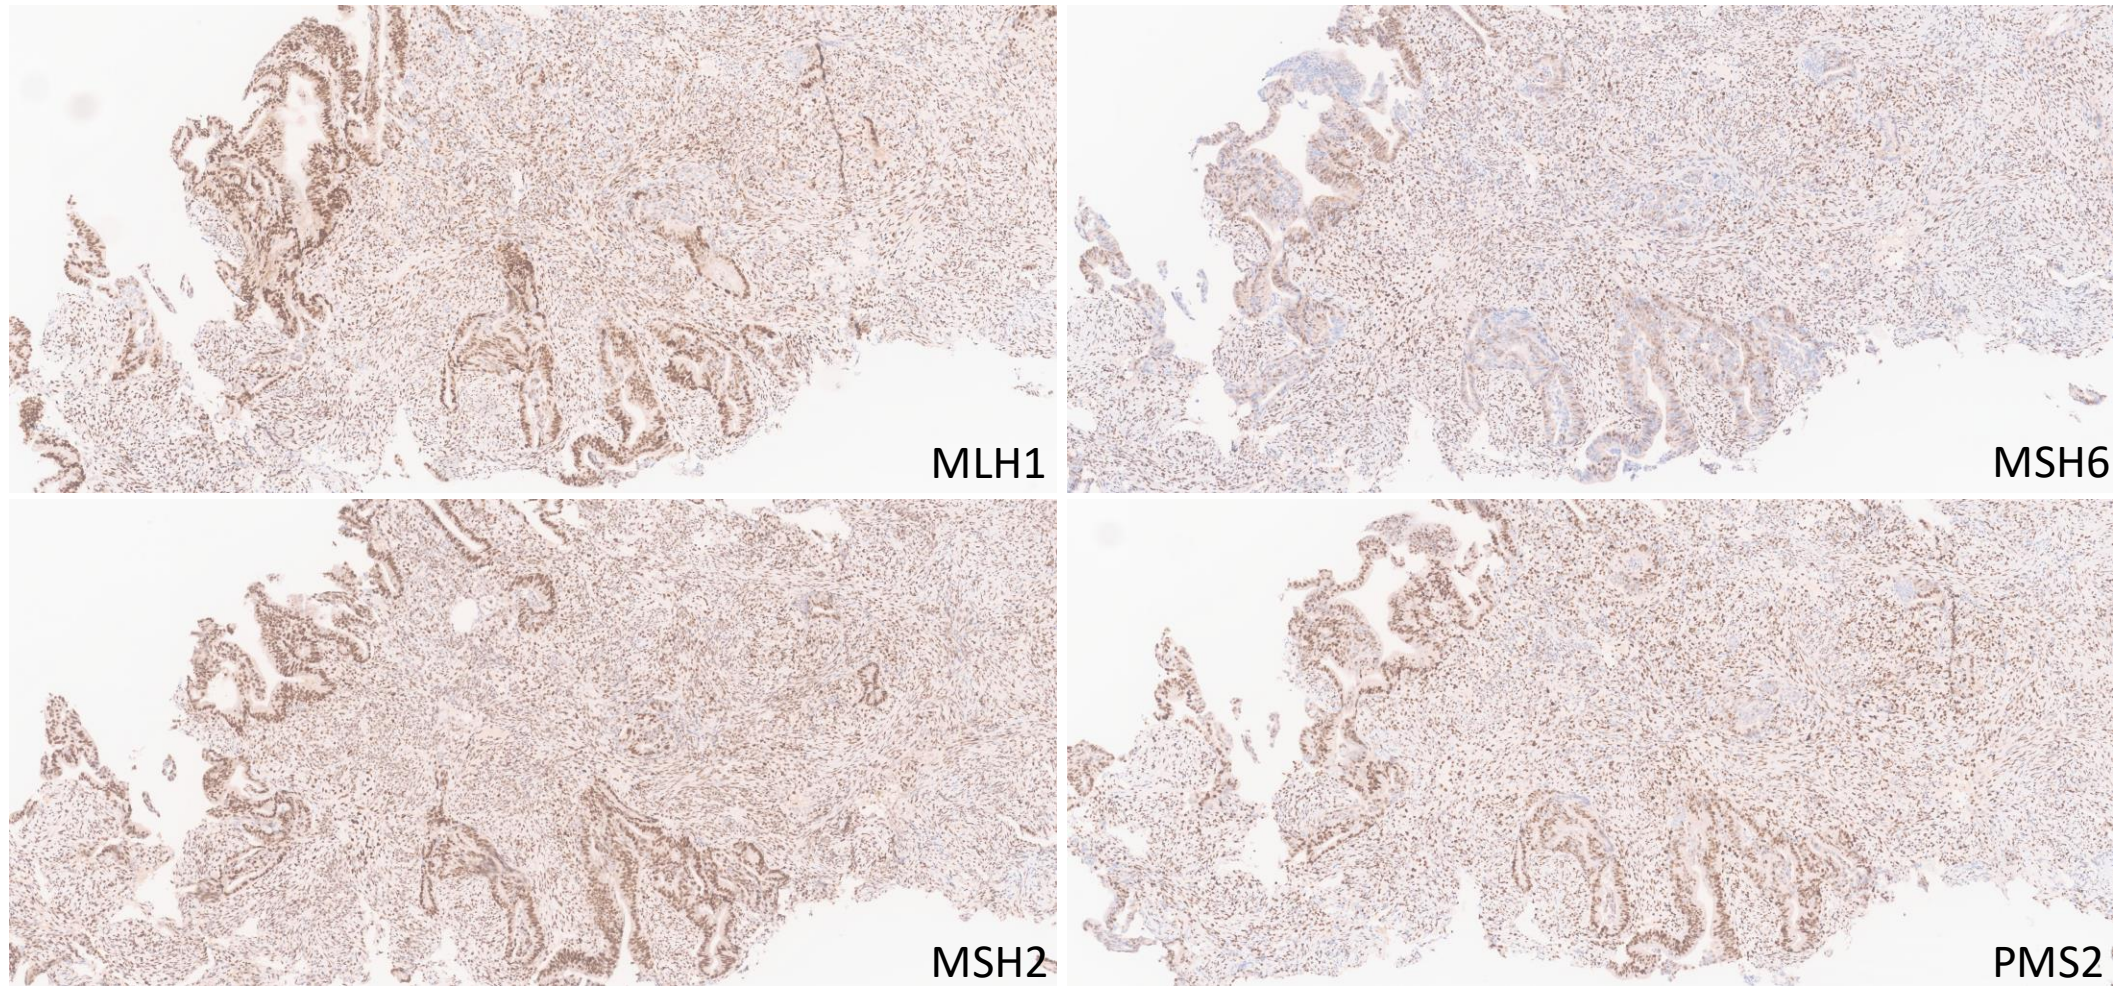

**Figure S2.** Immunohistochemistry of MMR proteins in colon cancer from proband of Family XIII. Male proband was diagnosed with colon cancer demonstrating partial loss of MSH6 in his 30s. This individual is known to carry *MSH6* c.2061T>G in the germline. Magnification 10x. IHC performed using Leica Biosystems anti-MLH1 (clone ES05) antibody, anti-MSH2 (clone C219-1129) antibody, anti-MSH6 (clone EP49) antibody, and anti-PMS2 (clone EP51) antibody.
