# Supplementary material
Source: Research Square preprint supplement (doi:10.21203/rs.3.rs-9172566/v1)
Supplement: Supplementary file 2 [file b20962cb895a7d409d095c9e.xlsx]

## Sheet: Sheet1
Table 1. Clinicopathological features of MSH6 c.2061T>G carriers
Family	Pedigree	Country	N	Relationship to Proband	Sex	MSH6 Status	Diagnosis	Age	IHC
									MLH1	MSH2	MSH6	PMS2
I	Pedigree S1	Canada	1	Proband	F	+/-	HL	36*	-
							EC	43*	retained	retained	absent	retained
							BlC	50*	-
							UC	50*	equivocal	weak	weak	absent a
							CRC	53*	retained
			2	Mother	F	+/+	-		-
			3	Daughter	F	+/-	-		-
			4	Son	M	+/+	-
			5	Sister	F	+/-	EC	58*	retained c
			6	Sister	F	+/-	-b		-
			7	Niece	F	+/-	-		-
			8	Nephew	M	+/-	-		-
			9	Nephew	M	+/+	HL		-
II	Pedigree S2	Canada	1	Proband	F	+/-	EC d	58*	retained	retained	absent	retained
			2	Daughter	F	+/+	BCC	18*	-
							ThC	31*	-
III	Pedigree S3	Portugal	1	Proband	F	+/-	EC e	49*	retained	retained	absent	retained
			2	Mother	F	+/-	EC	50	-
			3	Uncle (Mat)	M	+/-	CRC	69*	retained	retained	absent	retained
							BlC	74	retained
							SkC	75	-
			4	Aunt (Mat)	F	+/-	EC	58*	retained	absent	absent	retained
IV	Pedigree S4	Portugal	1	Proband	F	+/-	CRC g	81	-
							EC	82	retained
V	Pedigree S5	Portugal	1	Proband	F	+/-	SSA w/D x 1	43*	retained
							SSA x 1	43*	-
							TA(LGD) x 9	43*	-
							TvA(LGD) x 1	43*	-
							TA(HGD) x 1	60*	-
VI	Pedigree S6	Portugal	1	Proband	F	+/-	CRC	46*	retained	retained	N/A	retained
							EC	59*	retained	absent	retained	retained
			3	Daughter	F	+/-	TA(LGD) x 1	28	-
			4	Son	M	+/+	TA(LGD) x 1	33	-
			5	Sister	F	+/+	-		-
VII	Pedigree S7	Portugal	1	Proband	M	+/-	CRC	51	-
VIII	Pedigree S8	Switzerland	1	Proband	M	-/VUS	MB	7*	Loss of MSH6 in non-neoplastic cells f
							GIC	25
							MG
							HGG
IX	Pedigree S9	USA	1	Proband	UNK	+/-	CRC	52	-
X	Pedigree S10	USA	1	Proband	F	+/-	CRC	35	-
							EC	48	-
XI	Pedigree S11	USA	1	Proband	M	+/-	CRC g	60s	retained	retained	absent	retained
XII	Pedigree S12	USA	1	Proband	F	+/-	DCIS h	39	-
							CRC	40*	retained c	retained	partial loss	retained
			2	Sister	F	+/+	-		-
			3	Father	M	+/+	-		-
			4	2nd Cousin (Mat)	F	+/+	BrC	52	-
XIII	Pedigree S13	Portugal	1	Proband	M	+/-	CRC	34*	retained
XIV	Pedigree S14	Portugal	1	Proband	F	+/-	CRC	43	-
Legend
BCC - basal cell carcinoma						TA(HGD) - tubular adenoma with high grade dysplasia
BlC - bladder cancer						TA(LGD) - tubular adenoma with low grade dysplasia
BrC - breast cancer						ThC - thyroid cancer
CRC - colorectal cancer						TvA(LGD) - tubulovillous adenoma with low grade dysplasia
DCIS - ductal carcinoma in situ						UC - urothelial cancer
EC - endometrial cancer						a expression also absent in internal control
GIC - gastrointestinal cancer (origin unspecified)						b total abdominal hysterectomy at 53
HGG - high-grade glioma						c tumour also microsatellite stable
HL - Hodgkin's lymphoma						d MSH6 p.F1088Sfs*2 somatic variant present in tumour
MB - medulloblastoma						e MSH6 somatic truncating variant in tumour at 31% allele frequency
MG - Meningioma						f clinical CMMRD, carrier of MSH6 VUS c.1196C>T (p.Pro399Leu)
SkC- skin cancer						g two primary colorectal cancers
SSL w/D - sessile serrated lesion with dysplasia						h multifocal DCIS
SSA - sessile serrated lesion						* confirmed with medical records
